# Supplementary material for: Integrative Metabolomics and Proteomics Detected Hepatotoxicity in Mice Associated with Alkaloids from Eupatorium fortunei Turcz
Source: MDPI journal article supplement (doi:10.3390/toxins14110765), 2022-11-05
Supplement: s1 [file s1]

SUPPLEMENTARY MATERIALS

# Integrative Metabolomics and Proteomics Detected Hepatotoxicity in Mice Associated with Alkaloids from *Eupatorium fortunei* Turcz.

Ke Zan <sup>1</sup>, Wei Lei <sup>2,\*</sup>, Yaolei Li <sup>1</sup>, Ying Wang <sup>1</sup>, Lina Liu <sup>1</sup>, Tiantian Zuo <sup>1</sup>, Hongyu Jin <sup>1</sup> and Shuangcheng Ma <sup>1,\*</sup>

<sup>1</sup> National Institutes for Food and Drug Control, Beijing 102629, China

<sup>2</sup> State Key Laboratory of Component-Based Chinese Medicine, Tianjin University of Traditional Chinese Medicine, Tianjin 301617, China

\* Correspondence: weilei8910@tjutcm.edu.cn (W.L.); masc@nifdc.org.cn (S.M.)

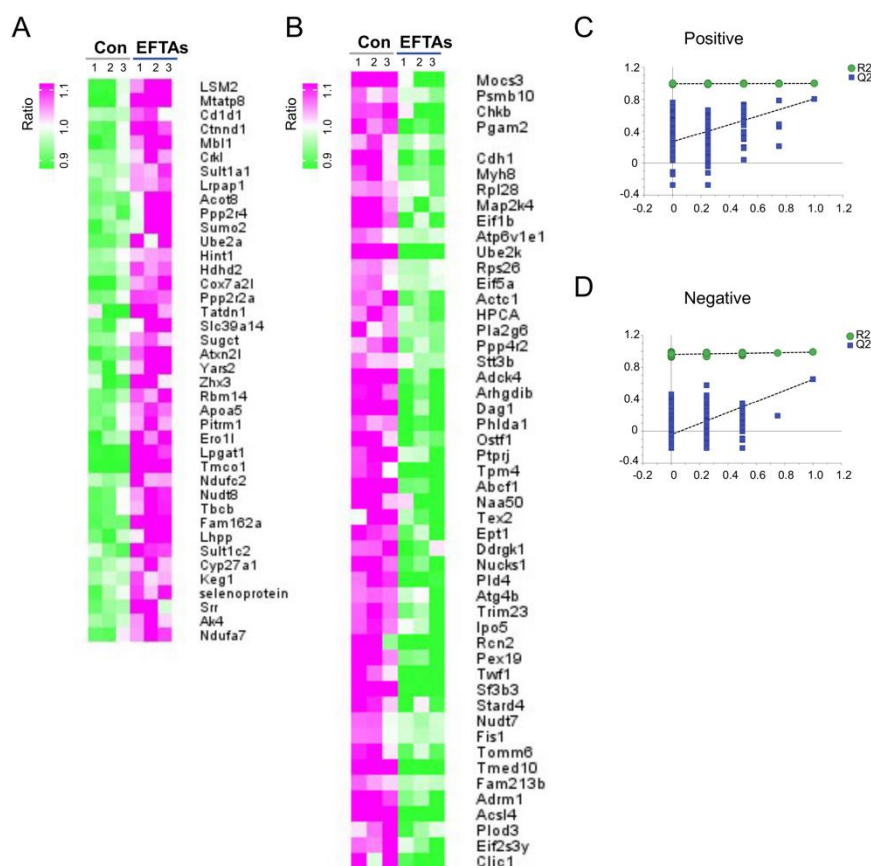

**Figure S1.** (A) The heatmap of upregulated proteins in hepatic proteomics. (B) The heatmap of downregulated proteins in hepatic proteomics. (C) The permutation test of OPLS-DA model in positive mode. (D) The permutation test of OPLS-DA model in negative mode.

## Original western blots

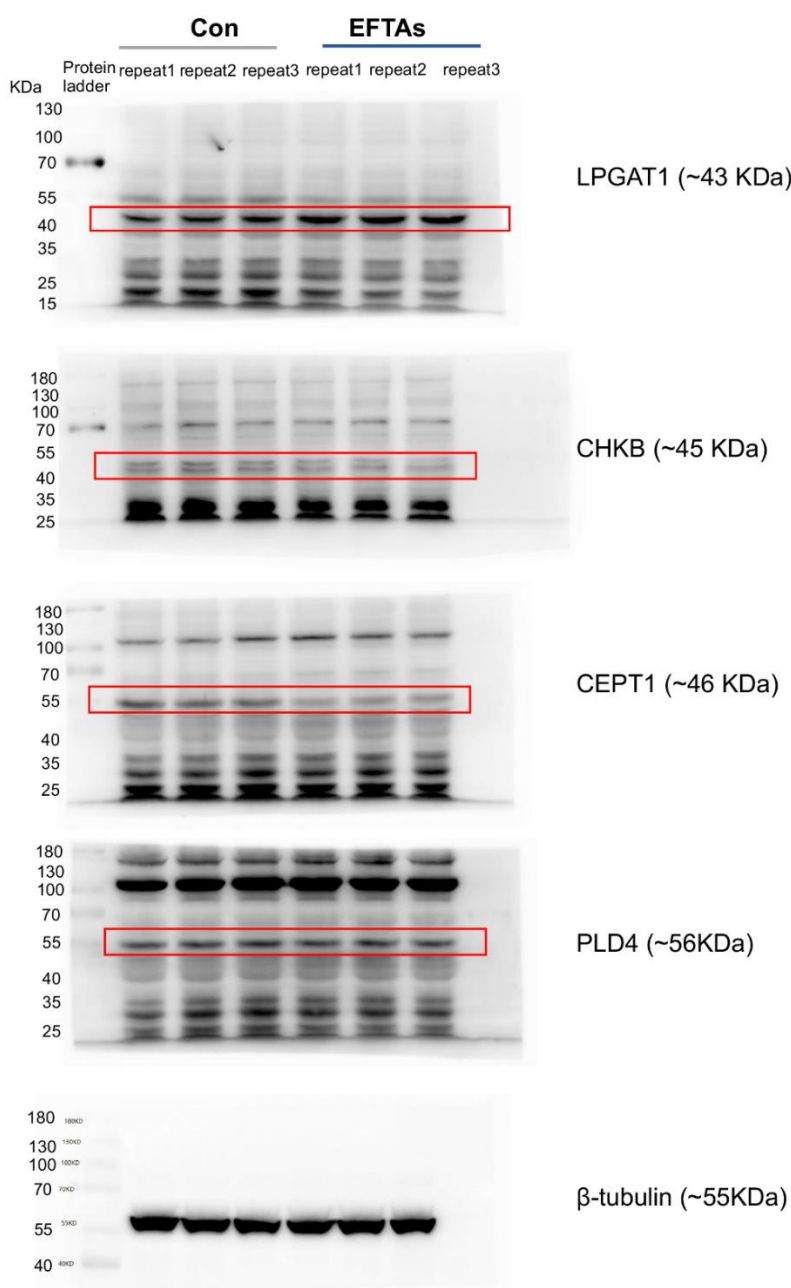

**Figure S2.** The original western blots of LPGAT1, CHKB, CEPT1 and PLD4.

**Table S1.** The identification of pyrrolizidine alkaloids in *E. fortunei*.

| No. | ingredients                 | tr/min | Composition                                     | MS <sup>(+)</sup> | MS/MS <sup>(+)</sup> |
|-----|-----------------------------|--------|-------------------------------------------------|-------------------|----------------------|
| 1   | Intermedine                 | 18.62  | C <sub>15</sub> H <sub>25</sub> NO <sub>5</sub> | 300.1             | 94.0, 138.1          |
| 2   | Lycopsamine                 | 19.63  | C <sub>15</sub> H <sub>25</sub> NO <sub>5</sub> | 300.0             | 94.1, 138.1          |
| 3   | Rinderine                   | 20.22  | C <sub>15</sub> H <sub>25</sub> NO <sub>5</sub> | 300.1             | 138.2, 156.2         |
| 4   | Echinatine                  | 20.61  | C <sub>15</sub> H <sub>25</sub> NO <sub>5</sub> | 300.2             | 138.2, 156.2         |
| 5   | Rinderine <i>N</i> -oxide   | 22.25  | C <sub>15</sub> H <sub>25</sub> NO <sub>6</sub> | 316.2             | 138.0, 226.2         |
| 6   | Echinatine <i>N</i> -oxide  | 22.78  | C <sub>15</sub> H <sub>25</sub> NO <sub>6</sub> | 316.1             | 172.0, 138.1         |
| 7   | Intermedine <i>N</i> -oxide | 23.19  | C <sub>15</sub> H <sub>25</sub> NO <sub>6</sub> | 316.2             | 172.1, 94.0          |
| 8   | Lycopsamine <i>N</i> -oxide | 23.85  | C <sub>15</sub> H <sub>25</sub> NO <sub>6</sub> | 316.2             | 172.0, 138.1         |

**Table S2.** The differential metabolites identified in hepatic metabolomics.

| No | Compounds                                                                 | RT (min) | Mass (g/mol) | Precursor (g/mol) | Formula                                                                     | VIP    | p-value         | FC    |
|----|---------------------------------------------------------------------------|----------|--------------|-------------------|-----------------------------------------------------------------------------|--------|-----------------|-------|
| 1  | 1-[(4-Bromophenyl)sulfonyl]-L-proline                                     | 1.5411   | 334.965      | 333.9571          | C <sub>11</sub> H <sub>12</sub> BrNO <sub>4</sub> S                         | 1.79   | 0.011           | 1.53  |
| 2  | 7-ketodeoxycholic acid                                                    | 6.8162   | 406.2719     | 405.2648          | C <sub>24</sub> H <sub>38</sub> O <sub>5</sub>                              | 1.57   | 0.032           | 0.40  |
| 3  | Hyodeoxycholic acid                                                       | 8.1198   | 392.2927     | 391.2854          | C <sub>24</sub> H <sub>40</sub> O <sub>4</sub>                              | 1.56   | 0.033           | 0.55  |
| 4  | Formimidoyl-fortimicin A                                                  | 10.2227  | 432.2696     | 387.2751          | C <sub>18</sub> H <sub>36</sub> N <sub>6</sub> O <sub>6</sub>               | 1.68   | 0.029           | 0.56  |
| 5  | gamma-Linolenic acid                                                      | 10.472   | 278.2246     | 277.2185          | C <sub>18</sub> H <sub>30</sub> O <sub>2</sub>                              | 1.68   | 0.020           | 0.64  |
| 6  | N-{4-[Acetyl(methyl)amino]phenyl}-2-chloroacetamide                       | 6.6738   | 240.0666     | 275.0361          | C <sub>11</sub> H <sub>13</sub> ClN <sub>2</sub> O <sub>2</sub>             | 1.75   | 0.011           | 1.93  |
| 7  | Palmitoleic acid                                                          | 10.796   | 254.2246     | 507.4413          | C <sub>16</sub> H <sub>30</sub> O <sub>2</sub>                              | 2.02   | 0.005           | 0.61  |
| 8  | MG(0:0/18:2(9Z,12Z)/0:0)                                                  | 10.505   | 354.277      | 389.2463          | C <sub>21</sub> H <sub>38</sub> O <sub>4</sub>                              | 1.63   | 0.014           | 0.492 |
| 9  | Taurohyodeoxycholic acid                                                  | 6.3928   | 499.2968     | 498.2892          | C <sub>26</sub> H <sub>45</sub> NO <sub>6</sub> S                           | 1.63   | 0.025           | 0.306 |
| 10 | 2-(1-Piperidiny)-1H-benzimidazole                                         | 3.8667   | 201.1266     | 236.092           | C <sub>12</sub> H <sub>15</sub> N <sub>3</sub>                              | 1.65   | 0.022           | 1.53  |
| 11 | 3,7-Dihydroxy-12-oxocholanoic acid                                        | 6.8162   | 406.2719     | 441.241           | C <sub>24</sub> H <sub>38</sub> O <sub>5</sub>                              | 1.56   | 0.034           | 0.41  |
| 12 | 9,10-Epoxy stearic acid                                                   | 9.2091   | 298.2508     | 297.2436          | C <sub>18</sub> H <sub>34</sub> O <sub>3</sub>                              | 2.01   | 0.0039          | 0.59  |
| 13 | 5,6-DHET                                                                  | 10.472   | 338.2457     | 359.2202          | C <sub>20</sub> H <sub>34</sub> O <sub>4</sub>                              | 1.70   | 0.018           | 0.66  |
| 14 | 7-Ethyl-10-(4-N-aminopentanoic acid)-1-piperidino)carbonyloxycamptothecin | 5.3499   | 618.269      | 599.2596          | C <sub>33</sub> H <sub>38</sub> N <sub>4</sub> O <sub>8</sub>               | 1.46   | 0.047           | 0.47  |
| 15 | 4-Hydroxyphenylacetic acid                                                | 3.1023   | 152.0473     | 107.05            | C <sub>8</sub> H <sub>8</sub> O <sub>3</sub>                                | 1.99   | 0.0045          | 1.838 |
| 16 | 2-Hydroxy Estrone                                                         | 5.9771   | 513.276      | 512.2683          | C <sub>26</sub> H <sub>43</sub> NO <sub>7</sub> S                           | 1.58   | 0.029           | 0.27  |
| 17 | Tauroursodeoxycholic acid                                                 | 5.9076   | 499.2968     | 498.288           | C <sub>26</sub> H <sub>45</sub> NO <sub>6</sub> S                           | 1.66   | 0.015           | 0.29  |
| 18 | Glycolaldehyde                                                            | 1.1375   | 60.0211      | 112.0227          | C <sub>2</sub> H <sub>4</sub> O <sub>2</sub>                                | 2.28   | 0.0002          | 2.32  |
| 19 | Ursodeoxycholic Acid                                                      | 7.0738   | 392.2927     | 451.3064          | C <sub>24</sub> H <sub>40</sub> O <sub>4</sub>                              | 1.59   | 0.027           | 0.42  |
| 20 | Quercetin                                                                 | 5.5035   | 302.0427     | 321.0432          | C <sub>15</sub> H <sub>10</sub> O <sub>7</sub>                              | 1.80   | 0.007           | 0.55  |
| 21 | N-Glycolylneuraminic acid                                                 | 1.2993   | 325.1009     | 360.0706          | C <sub>11</sub> H <sub>19</sub> NO <sub>10</sub>                            | 1.54   | 0.029           | 2.22  |
| 22 | beta-Doradecin                                                            | 8.694    | 580.3916     | 579.3901          | C <sub>40</sub> H <sub>52</sub> O <sub>3</sub>                              | 1.76   | 0.020           | 2.60  |
| 23 | Tuftsins                                                                  | 7.7219   | 500.3071     | 499.3054          | C <sub>21</sub> H <sub>40</sub> N <sub>8</sub> O <sub>6</sub>               | 1.6432 | 0.0270205<br>29 | 2.69  |
| 24 | Thr-Lys-Pro-Arg                                                           | 7.1071   | 500.3071     | 499.3053          | C <sub>21</sub> H <sub>40</sub> N <sub>8</sub> O <sub>6</sub>               | 1.55   | 0.035           | 1.89  |
| 25 | Ser-His-Val-Lys                                                           | 6.8162   | 469.2649     | 468.2602          | C <sub>20</sub> H <sub>35</sub> N <sub>7</sub> O <sub>6</sub>               | 1.53   | 0.037           | 0.41  |
| 26 | Phenicoxanthin                                                            | 9.4168   | 580.3916     | 579.3902          | C <sub>40</sub> H <sub>52</sub> O <sub>3</sub>                              | 1.58   | 0.038           | 1.81  |
| 27 | Oxidized Photinus luciferin                                               | 11.3111  | 249.9871     | 248.973           | C <sub>10</sub> H <sub>6</sub> N <sub>2</sub> O <sub>2</sub> S <sub>2</sub> | 1.95   | 0.004           | 1.56  |
| 28 | Oleoylglycerone phosphate                                                 | 7.9462   | 434.2433     | 450.2636          | C <sub>21</sub> H <sub>39</sub> O <sub>7</sub> P                            | 1.79   | 0.015           | 0.62  |
| 29 | N-Benzoyl-N'-(4-methoxyphenyl)thiourea                                    | 5.5035   | 286.0776     | 241.0866          | C <sub>15</sub> H <sub>14</sub> N <sub>2</sub> O <sub>2</sub> S             | 1.68   | 0.0135          | 0.51  |
| 30 | N-(2-Cyanophenyl)-4-fluorobenzamide                                       | 10.5717  | 240.0699     | 239.0632          | C <sub>14</sub> H <sub>9</sub> FN <sub>2</sub> O                            | 1.63   | 0.030           | 0.63  |
| 31 | Lys-Lys-OH                                                                | 11.6533  | 382.1852     | 381.174           | C <sub>12</sub> H <sub>26</sub> N <sub>4</sub> O <sub>3</sub>               | 1.53   | 0.038           | 0.35  |
| 32 | LPE(16:0/0:0)                                                             | 8.6691   | 453.2855     | 905.5649          | C <sub>21</sub> H <sub>44</sub> NO <sub>7</sub> P                           | 1.75   | 0.016           | 0.61  |
| 33 | Kaempferol 3-[6"-(3-hydroxy-3-methylglutaryl)glucoside]-7-glucoside       | 0.7925   | 754.1956     | 753.1879          | C <sub>33</sub> H <sub>38</sub> O <sub>20</sub>                             | 2.06   | 0.004           | 0.549 |
| 34 | Ile-Pro-Ala-Asp-Val                                                       | 5.9729   | 513.2799     | 594.2692          | C <sub>23</sub> H <sub>39</sub> N <sub>5</sub> O <sub>8</sub>               | 1.51   | 0.038           | 0.44  |
| 35 | Gly-Leu-Arg                                                               | 11.6518  | 344.2172     | 379.1788          | C <sub>14</sub> H <sub>28</sub> N <sub>6</sub> O <sub>4</sub>               | 1.71   | 0.017           | 0.32  |
| 36 | Gly-Asp-Ile-Val-Ile                                                       | 6.11     | 515.2955     | 596.2852          | C <sub>23</sub> H <sub>41</sub> N <sub>5</sub> O <sub>8</sub>               | 1.65   | 0.022           | 0.41  |
| 37 | Glutathione Reducedform                                                   | 0.9753   | 307.0838     | 306.0769          | C <sub>10</sub> H <sub>17</sub> N <sub>3</sub> O <sub>6</sub> S             | 1.72   | 0.013           | 0.58  |
| 38 | Ferroxamine                                                               | 6.4007   | 613.2649     | 612.2524          | C <sub>25</sub> H <sub>45</sub> FeN <sub>6</sub> O <sub>8</sub>             | 1.54   | 0.029           | 0.55  |
| 39 | Dimethyl 2-galloylgalactarate                                             | 0.859    | 390.0798     | 471.0604          | C <sub>15</sub> H <sub>18</sub> O <sub>12</sub>                             | 1.46   | 0.042           | 0.51  |
| 40 | Carmamycin A                                                              | 5.5533   | 515.3029     | 514.2852          | C <sub>25</sub> H <sub>45</sub> N <sub>3</sub> O <sub>6</sub> S             | 1.55   | 0.036           | 0.44  |
| 41 | CID 101493123                                                             | 12.1137  | 374.2668     | 596.3907          | C <sub>20</sub> H <sub>38</sub> O <sub>6</sub>                              | 1.96   | 0.0032          | 1.62  |
| 42 | 1-Oleoylglycerophosphoinositol                                            | 12.1087  | 598.3118     | 619.2877          | C <sub>27</sub> H <sub>51</sub> O <sub>12</sub> P                           | 1.64   | 0.028           | 1.66  |
| 43 | (3R,4S,9R,11R)-29-(4-hydroxyphenyl)-4-methylnonacosane-3,9,11-triol       | 10.472   | 562.4961     | 583.4701          | C <sub>36</sub> H <sub>66</sub> O <sub>4</sub>                              | 1.86   | 0.009           | 0.57  |

RT, retention time; VIP, variable influence in projection; FC, fold change.
